# Supplementary material for: Immobilization of Chlamydomonas reinhardtii CLH1 on APTES-Coated Magnetic Iron Oxide Nanoparticles and Its Potential in the Production of Chlorophyll Derivatives
Source: MDPI journal article supplement (doi:10.3390/molecules21080972), 2016-07-26
Supplement: s1 [file s1]

## Supplementary Materials: Immobilization of *Chlamydomonas reinhardtii* CLH1 on APTES-Coated Magnetic Iron Oxide Nanoparticles and Its Potential in the Production of Chlorophyll Derivatives

Chih-Chung Yen, Yao-Chen Chuang, Chia-Yun Ko, Long-Fang O. Chen, Sheau-Shyang Chen, Chia-Jung Lin, Yi-Li Chou and Jei-Fu Shaw

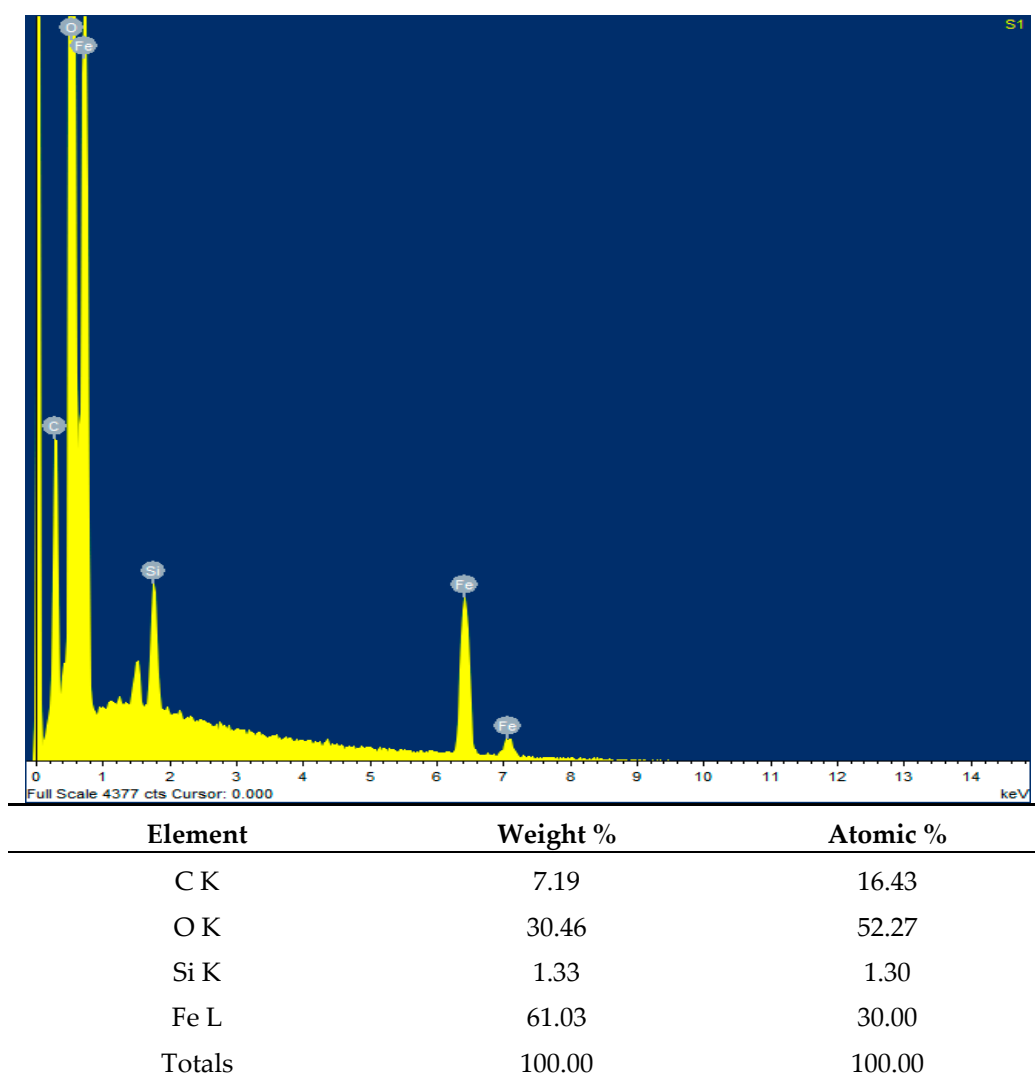

**Figure S1.** EDX elemental analysis of APTS-coated magnetic nanoparticles.

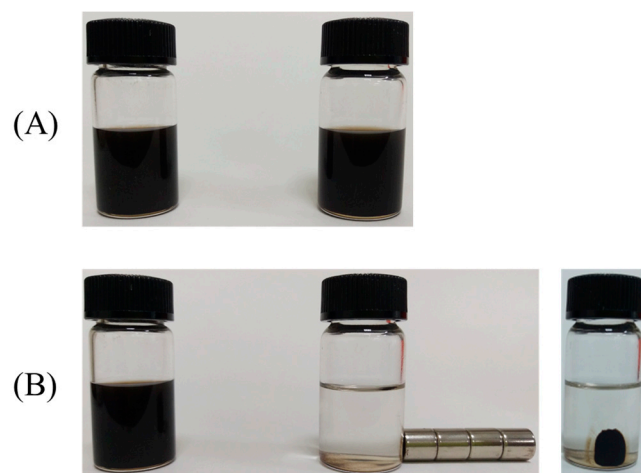

**Figure S2.** The synthesized magnetic nanoparticles were attracted by a magnet, indicating its magnetic characteristics. (A) Magnetic nanoparticles distributed in suspension (B) magnetic nanoparticles could be very easily and efficiently collected from the suspension using a magnet.
